# Supplementary material
Source: MDPI journal article supplement (https://www.mdpi.com/2073-4441/15/13/2500)

Figure S1. Mean air temperature in Lichk, Norashen and Lchashen bays of Lake Sevan (Armenia) from May to October 2020.

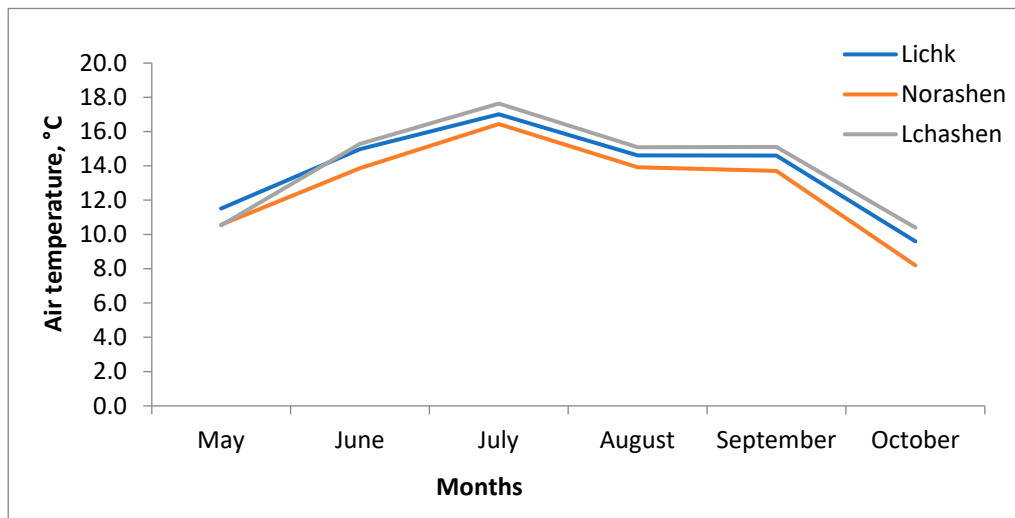

Figure S2. Total numbers of Bacillariophyta (diatom) genera/species in Lichk, Norashen and Lchashen bays of Lake Sevan (Armenia) in 2020 by season.

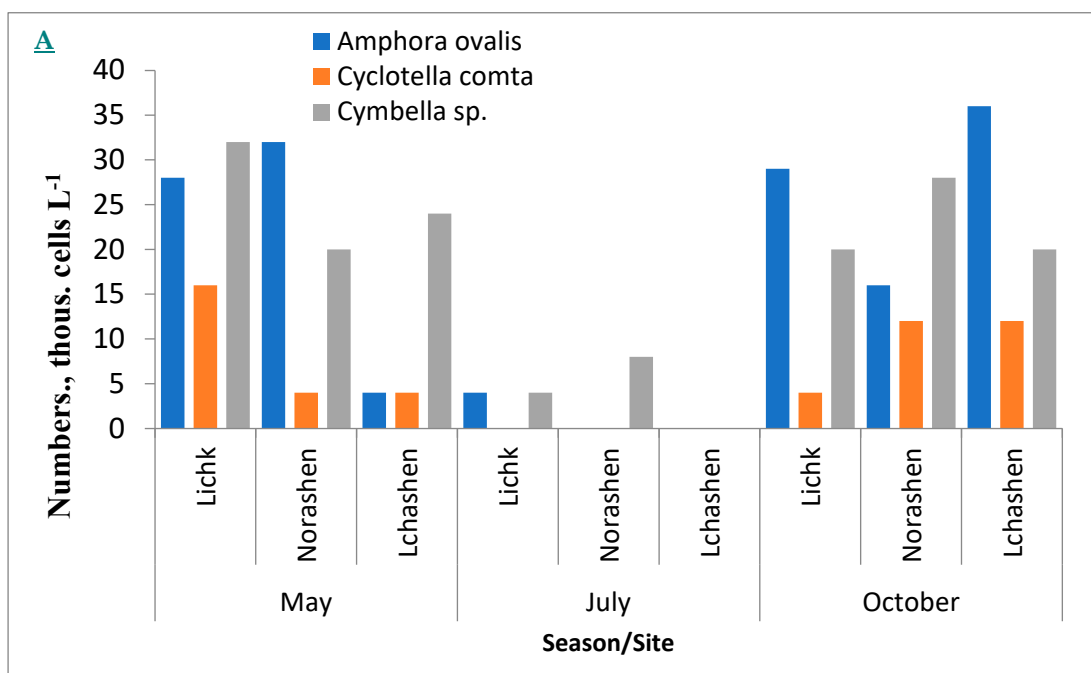

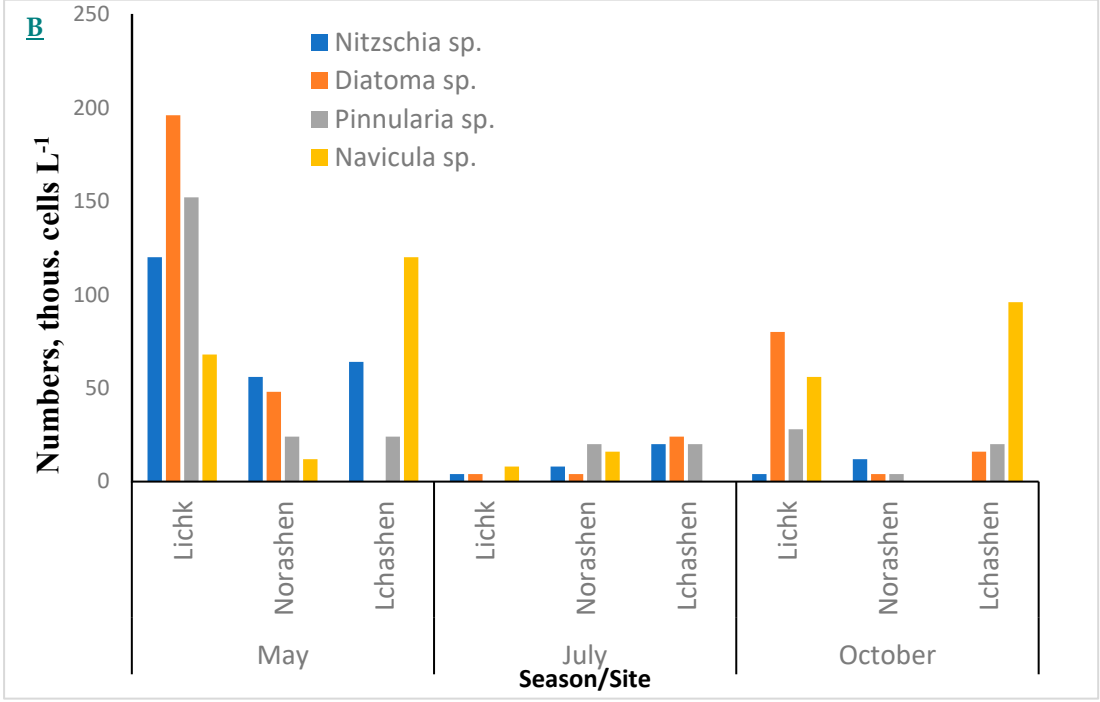

Supplement: s1 [file s1]
